# Supplementary material for: Myosin VI and Optineurin Are Required for Polarized EGFR Delivery and Directed Migration
Source: PubMed Central journal article supplement (PMC3039242; doi:10.1111/j.1600-0854.2010.01101.x), 2010-08-03
Supplement: tra0011-1290-SD1.pdf [file tra0011-1290-SD1.pdf]

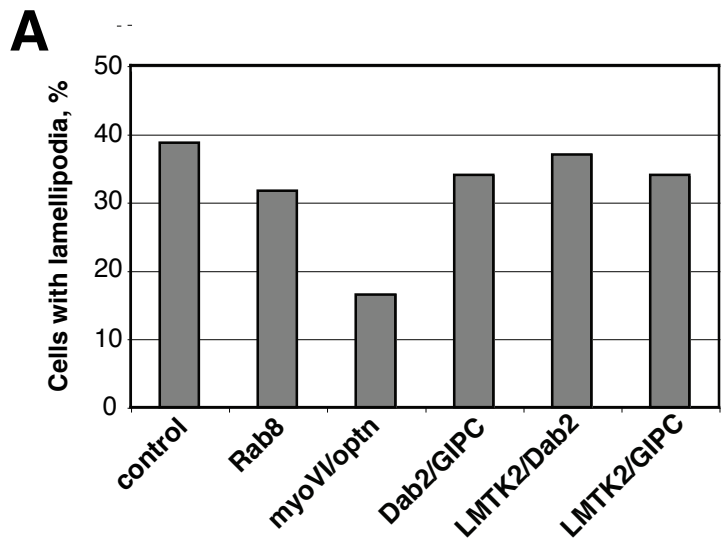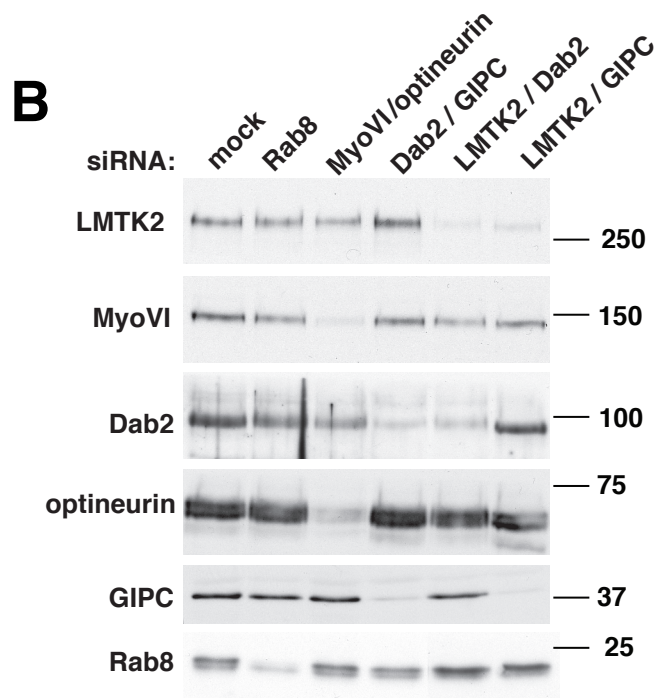

Supplementary figure 1, Chibalina et al
